# Supplementary material
Source: PubMed Central journal article supplement (PMC6758578)

**Fig. S1**

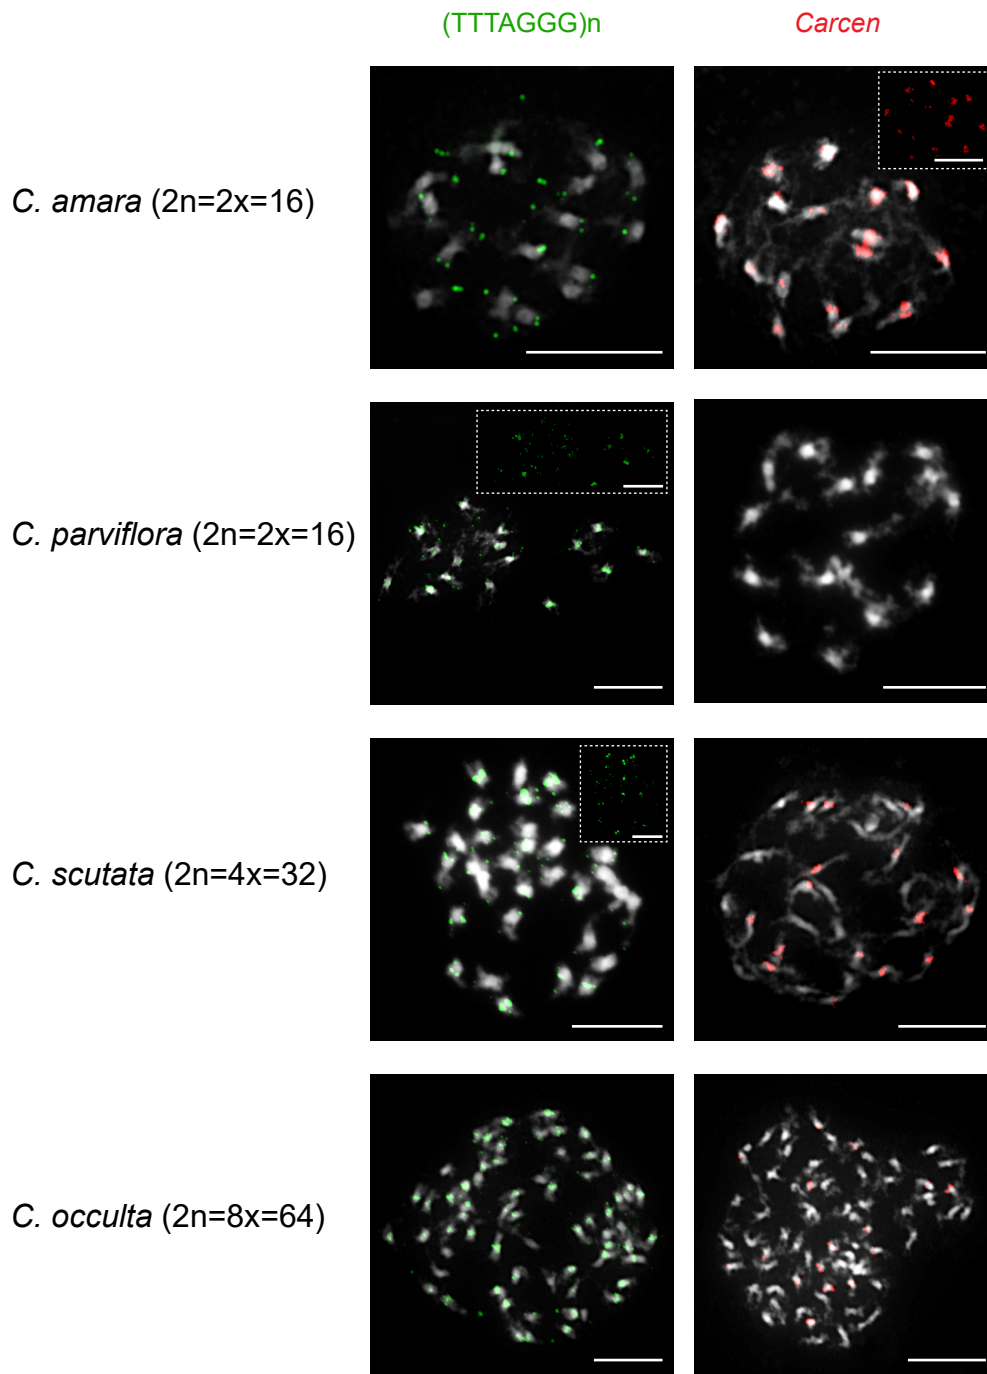

Fig. S2

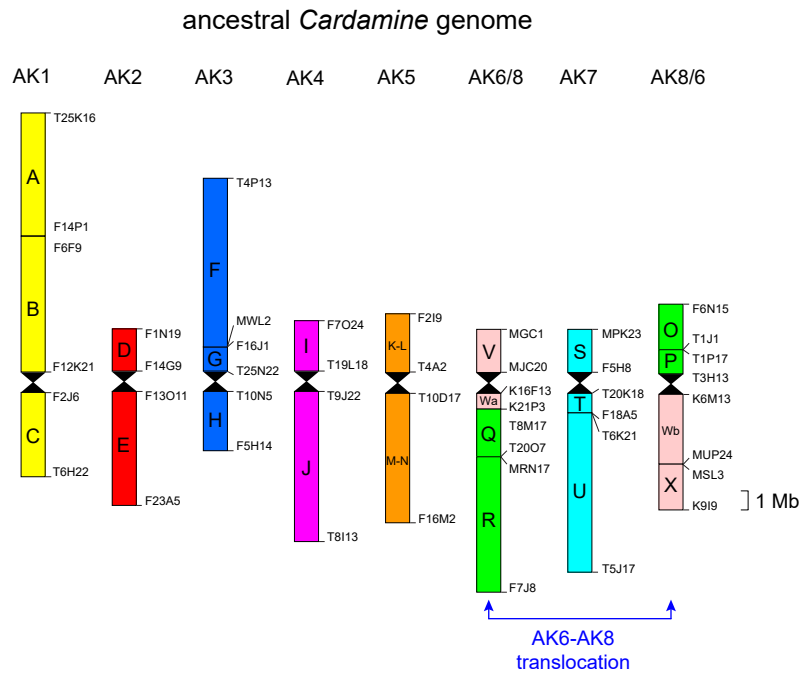

Supplement: mcz019_supplementary_figures_1-2.pdf [file mcz019_supplementary_figures_1-2.pdf]
